# Supplementary material for: An oscillating C22? unit inside a copper rectangleElectronic supplementary information (ESI) available: NMR spectra and computational details. See http://www.rsc.org/suppdata/cc/b3/b301842c/
Source: Royal Society of Chemistry journal article supplement (doi:10.1039/b301842c), 2003-01-01
Supplement: b301842c.pdf [file b301842c.pdf]

# **An oscillating $C_2^{2-}$ unit inside a copper rectangle**

Wing-Yin Lo, Chi-Ho Lam, Wendy Kit-Mai Fung, Hong-Zhe Sun, Vivian Wing-Wah Yam,

David Balcells, Feliu Maseras and Odile Eisenstein

*Centre for Carbon-Rich Molecular and Nano-Scale Metal-Based Materials Research and the Department of*

*Chemistry, The University of Hong Kong, Pokfulam Road, Hong Kong SAR, People's Republic of China*

*Unitat de Química Física, Edifici Cn, Universitat Autònoma de Barcelona, 08193 Bellaterra, Catalonia, Spain*

*LSDSMS, UMR 5636, Université Montpellier 2, 34095 Montpellier, France*

**Electronic Supplementary Information**

## Computational Details

All calculations have been performed with the Gaussian 98 package<sup>1</sup> within the hybrid DFT (Becke3LYP)<sup>2</sup> level. Two basis sets, I and II, have been used. Basis set I, used for geometry optimizations and frequency calculations, is double- $\zeta$  for all atoms (LANL2DZ for Cu and P<sup>3</sup>; 6-31G for acetylide carbons<sup>4</sup>) except the phosphine substituents which are described with a minimal STO-3G basis.<sup>5</sup> Basis set I consists of 214 basis functions. Basis set II, which was used to refine the energetics, is double- $\zeta$  for all atoms, including the phosphine substituents (6-31G for C, H), and includes polarization functions on phosphorus<sup>6</sup> and on the acetylide carbons (6-31G(d)).<sup>7</sup> Basis set II consists of 304 basis functions. The computed free energy values for basis set II were obtained by adding the basis II electronic energy to the thermal, zero-point and entropic corrections computed with basis set I. All calculations were carried out without any symmetry constraint. The nature of all optimized stationary points was confirmed through analytic calculations of the second derivatives.

## References

1. M. J. Frisch, G. W. Trucks, H. B. Schlegel, G. E. Scuseria, M. A. Robb, J. R. Cheeseman, V. G. Zakrzewski, J. A. Montgomery, R. E. Stratmann, J. C. Burant, S. Dapprich, J. M. Millam, A. D. Daniels, K. N. Kudin, M. C. Strain, O. Farkas, J. Tomasi, V. Barone, M. Cossi, R. Cammi, B. Mennucci, C. Pomelli, C. Adamo, S. Clifford, J. Ochterski, G. A. Petersson, P. Y. Ayala, Q. Cui, K. Morokuma, D. K. Malick, A. D. Rabuck, K. Raghavachari, J. B. Foresman, J. Cioslowski, J. V. Ortiz, B. B. Stefanov, G. Liu, A. Liashenko, P. Piskorz, P. I. Komaromi, G. Gomperts, R. L. Martin, D. J. Fox, T. Keith, M. A. Al-Laham, C. Y. Peng, A. Nanayakkara, C. Gonzalez, M. Challacombe, P. M. W. Gill, B. G. Johnson, W. Chen, M. W. Wong, J. L. Andres, M. Head-Gordon, E. S. Replogle and J. A. Pople, Gaussian 98, Gaussian, Inc.: Pittsburgh, PA, 1998.

2. (a) A. D. Becke, *J. Chem. Phys.*, 1993, **98**, 5648. (b) C. Lee, W. Yang, and R. G. Parr, *Phys. Rev. B*, 1988, **37**, 785. (c) P. J. Stephens, F. J. Devlin, C. F. Chabalowski, and M. J. Frisch, *J. Phys. Chem.*, 1994, **98**, 11623.
3. (a) W. R. Wadt and P. J. Hay, *J. Chem. Phys.*, 1985, **82**, 284. (b) P. J. Hay and W. R. Wadt, *J. Chem. Phys.*, 1985, **82**, 299.
4. W. J. Hehre, R. Ditchfield and J. A. Pople, *J. Chem. Phys.*, 1972, **56**, 253.
5. W. J. Hehre, R. F. Stewart and J. A. Pople, *J. Chem. Phys.*, 1969, **51**, 2657.
6. A. Höllwarth, M. Böhme, A. Dapprich, A. W. Ehlers, A. Gobbi, V. Jonas, K. F. Kohler, R. Stegmann, A. Veldkamp, and G. Frenking, *Chem. Phys. Lett.*, 1993, **208**, 237.
7. P. C. Hariharan and J. A. Pople, *Theor. Chim. Acta*, 1973, **28**, 213.

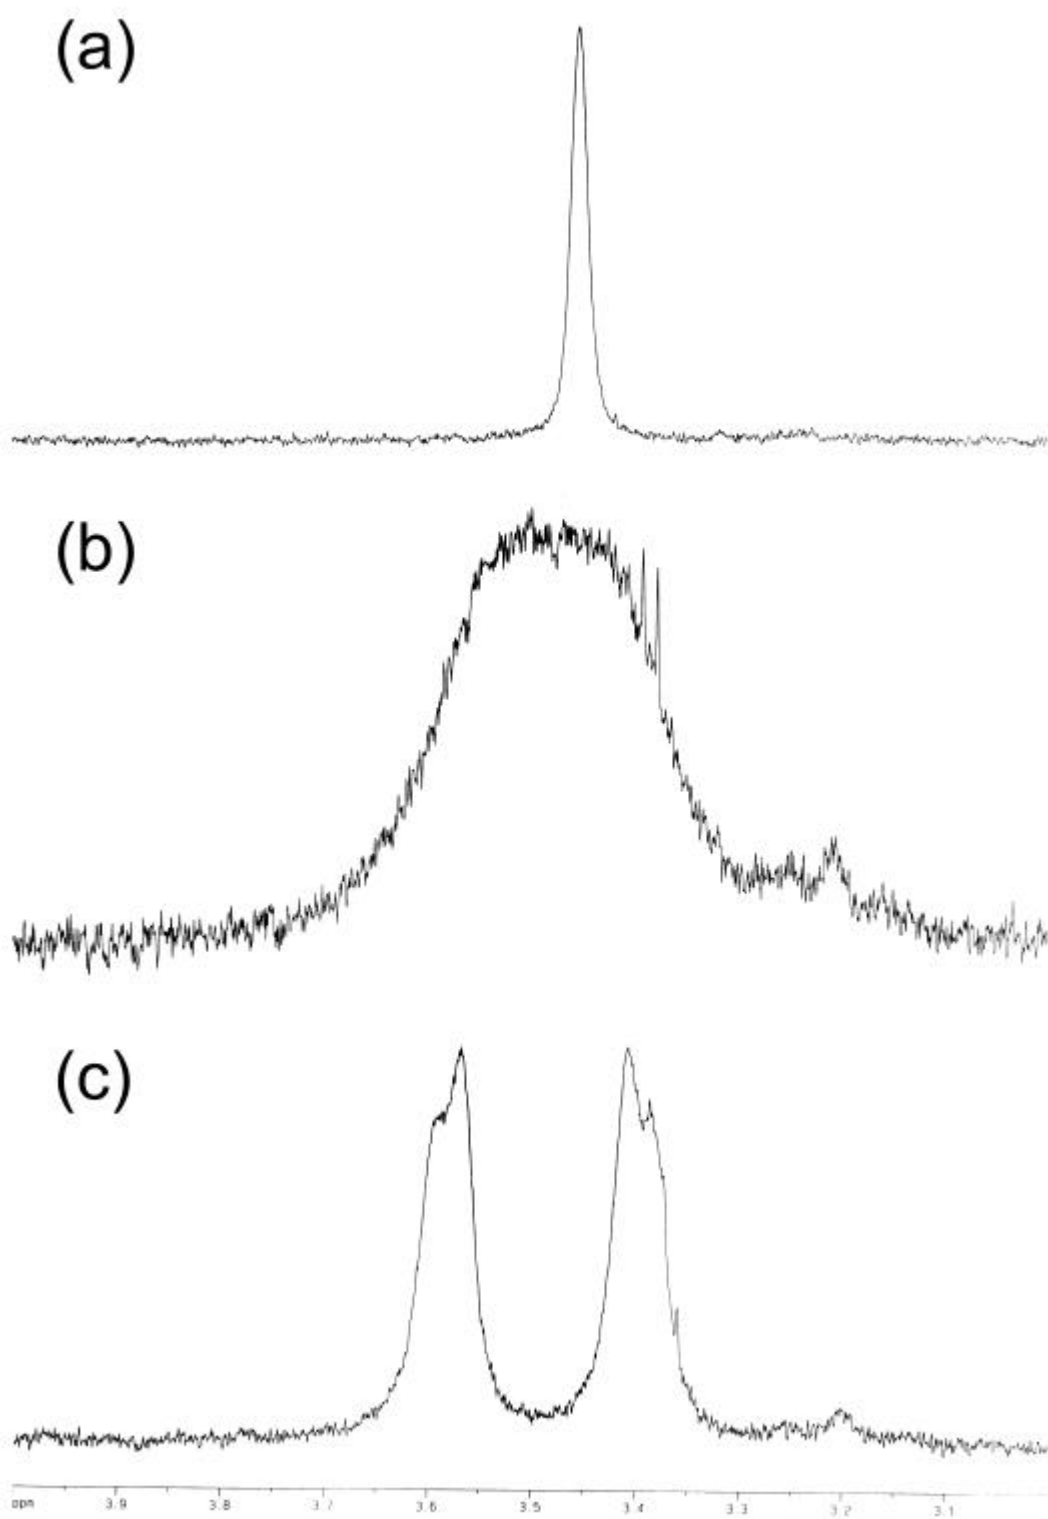

$^1\text{H}$  NMR (500MHz) spectra of  $[\text{Cu}_4(\mu\text{-dppm})_4(\mu_4\text{-}\eta^1, \eta^2\text{-}^{13}\text{C}\equiv^{13}\text{C-})]^{2+}$  recorded in dichloromethane- $d_2$  at (a) 273 K (b) 234 K, and (c) 198 K

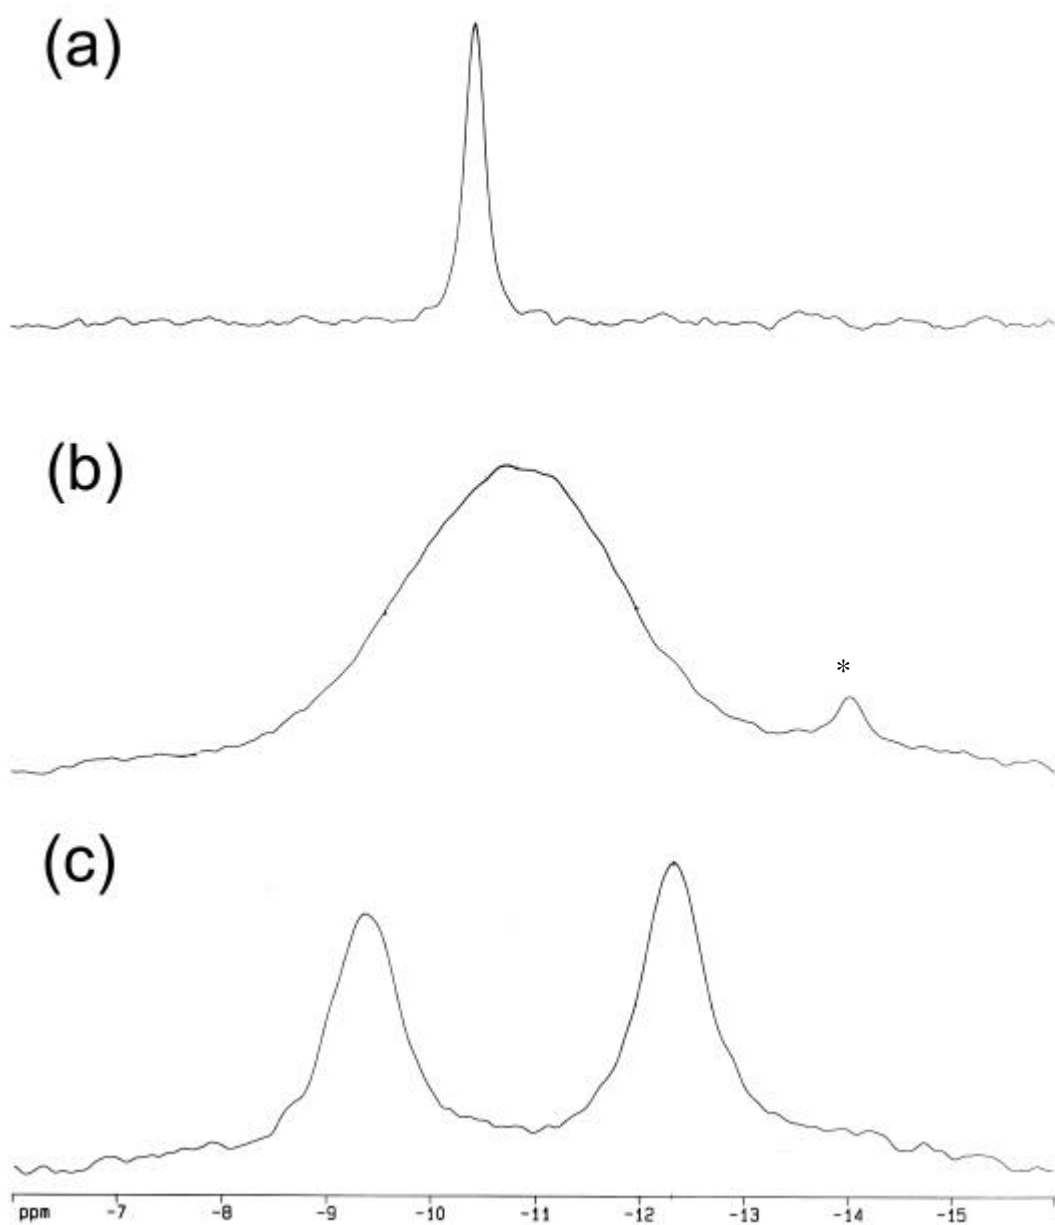

$^{31}\text{P}\{^1\text{H}\}$  NMR (202MHz) spectra of  $[\text{Cu}_4(\mu\text{-dppm})_4(\mu_4\text{-}\eta^1, \eta^2\text{-}^{13}\text{C}\equiv^{13}\text{C-})]^{2+}$  recorded in dichloromethane- $d_2$  at (a) 273 K (b) 195 K, and (c) 182 K. (\*) is an impurity

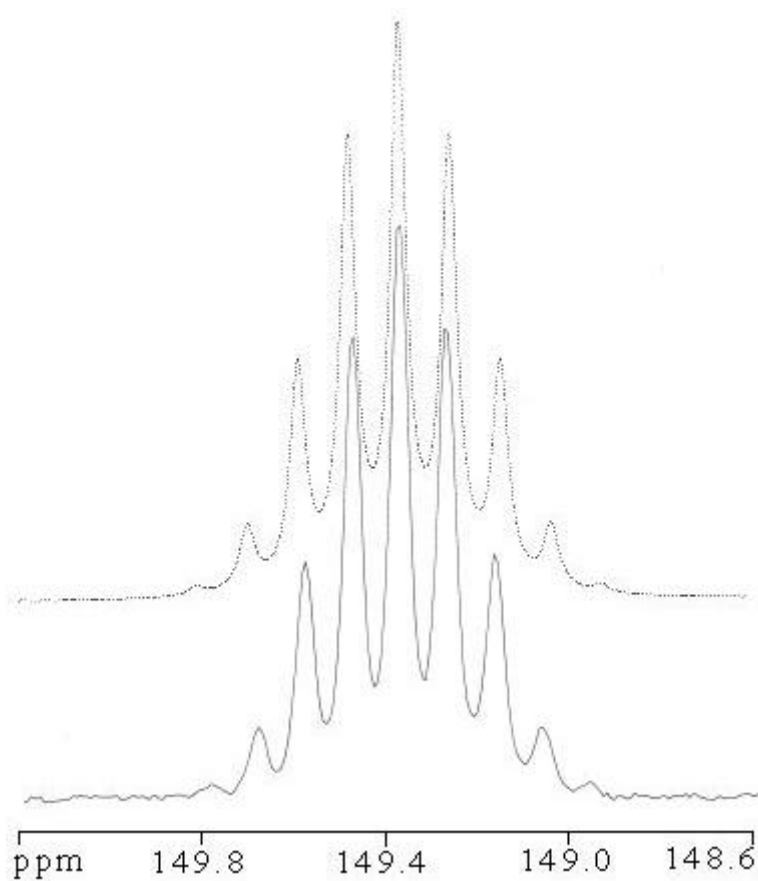

The experimental (bottom trace) and simulated (top trace)  $^{13}\text{C}$  NMR spectrum of  $[\text{Cu}_4(\mu\text{-dppm})_4(\mu_4\text{-}\eta^1, \eta^2\text{-}^{13}\text{C}\equiv^{13}\text{C-})]^{2+}$  recorded in dichloromethane- $d_2$  at room temperature with 6 hr data accumulation.
